# Supplementary material
Source: PubMed Central journal article supplement (PMC4191814)
Supplement: pnas.201411570SI.pdf [file pnas.201411570SI.pdf]

# Supporting Information

Weber et al. 10.1073/pnas.1411570111

## SI Materials and Methods

The plasmid pBAD18-*lacZ*481 (1) was used to create *toxT* 5' UTR translational fusions. The *toxT* 5' UTR region from +1 to +71 with respect to the transcription start site (2) was PCR amplified from *Vibrio cholerae* genomic DNA using primers NheI-*toxT* and *toxT*-EcoRI (Table S1), digested with NheI and EcoRI and ligated into pBAD18-*lacZ*481 digested similarly. This created plasmid pBO1296, which transcribes *lacZ* from the pBAD promoter that is translated from the native *toxT* 5' UTR. *toxT* 5' UTR mutations U5C and/or U7C were introduced by site-directed mutagenesis (QuikChange, Stratagene; Table S1 provides a complete list of primers) into pBO1296, resulting in pBO1826 (*toxT* 5' UTR U5C), pBO1829 (*toxT* 5' UTR U7C), and pKEK1807 (*toxT* 5' UTR U5C, U7C).

*toxT* translated from its native 5' UTR was PCR amplified with oligos WT 5' UTR Fw NheI and ToxT Rev SphI, then digested with NheI and SphI, and finally ligated into pBAD18-*lacZ*481 that had been digested similarly to create plasmid pKEK1682, which transcribes *toxT* with its native UTR from the pBAD promoter. *toxT* 5' UTR mutations U5C and/or U7C were introduced into pKEK1682 by site-directed mutagenesis.

pKEK87 contains *toxT* transcribed from the pBAD promoter and translated from the *araBAD* 5' UTR (3). *toxT*-FLAG translated from the *toxT* 5' UTR was created by PCR amplification of pKEK1682, pKEK1683, pKEK1684, and pKEK1685 with oligos ToxT-FLAG Fw and ToxT-FLAG Rev, followed by digestion with DpnI and transformation into DH5 $\alpha$  to create pKEK1733 (native 5' UTR-*toxT*-FLAG), pKEK1734 (U5C UTR *toxT*-FLAG), pKEK1735 (U7C UTR *toxT*-FLAG), and pKEK1736 (U5C, U7C UTR *toxT*-FLAG). The U5C and/or U7C mutations were introduced by site-directed mutagenesis (Stratagene QuikChange) into plasmid pKEK1445 [*toxT* with 1-kb flanking regions in pKAS46 (4)] to create plasmids pKEK1468, pKEK1469, and pKEK1808.

The plasmids used in RNA structure probing experiments were created by PCR amplification of the *toxT* 5' UTR with primers T7-*toxT* and *toxT*-runoff-SP, and ligation into pUC18 to create plasmid pBO1299. This introduced a T7 promoter sequence upstream and an MspI site downstream of the *toxT* 5' UTR. The U5C, U7C mutations were introduced into pBO1299 by site-directed mutagenesis resulting in plasmid pBO1845.

1. Waldminghaus T, Fippinger A, Alfsmann J, Narberhaus F (2005) RNA thermometers are common in alpha- and gamma-proteobacteria. *Biol Chem* 386(12):1279–1286.
2. Yu RR, DiRita VJ (1999) Analysis of an autoregulatory loop controlling ToxT, cholera toxin, and toxin-coregulated pilus production in *Vibrio cholerae*. *J Bacteriol* 181(8): 2584–2592.
3. Klose KE, Mekalanos JJ (1998) Distinct roles of an alternative sigma factor during both free-swimming and colonizing phases of the *Vibrio cholerae* pathogenic cycle. *Mol Microbiol* 28(3):501–520.
4. Skorupski K, Taylor RK (1996) Positive selection vectors for allelic exchange. *Gene* 169(1): 47–52.



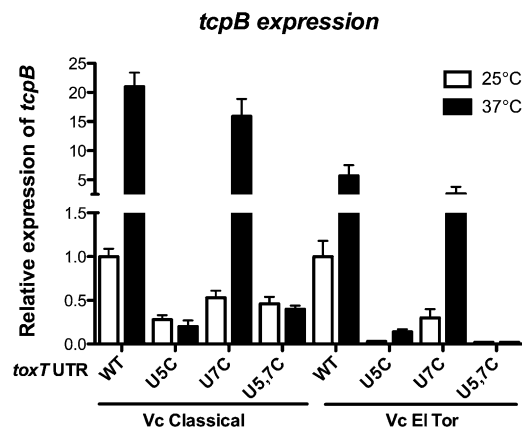

**Fig. S3.** The *toxT* 5' UTR fourU RNA thermometer facilitates temperature-dependent expression of *tcpB*. *V. cholerae* O1  $\Delta$ *toxT* strains KKV2288 (Classical) and KKV2426 (El Tor) carrying plasmids pKEK1682 (5'-*toxT* UTR-*toxT*), pKEK1683 (5'-U5C *toxT* UTR-*toxT*), pKEK1685 (5'-U7C *toxT* UTR-*toxT*), or pKEK1686 (5'-U5C U7C *toxT* UTR-*toxT*) were grown at 25 °C and 37 °C in the presence of 0.1% arabinose and harvested at identical cell densities ( $OD_{600} = 0.6$ ). mRNA abundance for *tcpB* was determined by quantitative RT-PCR (*Materials and Methods*). These results are from the same strains shown in Fig. 4. *tcpB* transcription was higher at 37° than at 25° in strains expressing the native UTR-*toxT*, ( $P < 0.001$  classical and  $P < 0.01$  El Tor). The U5C and U5C U7C UTRs caused significant decreases in *ctx* transcription ( $P < 0.001$  at 37 °C for both classical and El Tor). The U7C UTR had little effect on *ctx* transcription (no significant difference for classical or El Tor).

**Table S1. Oligonucleotides used in this study**

| Name                   | Sequence                                                                          |
|------------------------|-----------------------------------------------------------------------------------|
| U5C pKAS Fw            | GTTATGTAGTTTTATATTAACCTCGACTTTAAGATAACTTTACGTGGATGGCT                             |
| U5C pKAS Rev           | AGCCATCCACGTAAGTTATCTTAAAGTCGAAGTTAATATAAACTACATAAC                               |
| U7C pKAS Fw            | GTTATGTAGTTTTATATTAACCTCGATTCTAAGATAACTTTACGTGGATGGCTCTCT                         |
| U7C pKAS Rev           | AGAGAGCCATCCACGTAAGTTATCTTAGAATCGAAGTTAATATAAACTACATAAC                           |
| U5,7C pKAS Fw          | GTAGTTTTATATTAACCTCGACTCTAAGATAACTTTACGTGGATG                                     |
| U5,7C pKAS Rev         | CATCCACGTAAGTTATCTTAGAGTCGAAGTTAATATAAACTAC                                       |
| WT5'UTRFw NheI         | GCGCGCTAGCTCGATTTTTAAGATAACTTTACGTGGATGGC                                         |
| U5C Fw NheI            | GCGCGCTAGCTCGACTTTAAGATAACTTTACGTGGATGGC                                          |
| U7C Fw NheI            | GCGCGCTAGCTCGATTCTAAGATAACTTTACGTGGATGGC                                          |
| U5,7C Fw NheI          | GCGCGCTAGCTCGACTCTAAGATAACTTTACGTGGATGGC                                          |
| ToxT Rev SphI          | CGCGCATGCTTATTTTTCTGCAACTCTGTCAAC                                                 |
| pBAD U5,7C Fw          | CCGTTTTTTGGGCTAGCTCGACTCTAAGATAACTTTACGTGGATGGC                                   |
| pBAD U5,7C Rev         | GCCATCCACGTAAGTTATCTTAGAGTCGAGCTAGCCCAAAAAACGG                                    |
| ToxT-FLAG Fw           | GATTACAAGGATGACGATGACAAGTAAAAGCTTGGCTGTTTTGGCGGATGAGAGAAGATT                      |
| ToxT-FLAG Rev          | TTACTTGTTCATCGTCATCCTTGTAACTTTTTCTGCAACTCTGTCAACATAAATAAATA                       |
| ToxT-FLAG KEK87 Fw     | TTTATGTTGACAGGAGTTGCAGAAAAAGATTACAAGGATGACCATGACAAGTAATCTAGAGTCGACCTGCAGGCATGCAAG |
| ToxT-FLAG KEK87 Rev    | CTTGATGCCTGCAGGTCGACTCTAGATTACTTGTTCATCGTCATCCTTGTAACTTTTTCTGCAACTCTGTCAACATAAA   |
| ToxT Fw RT             | GGCGTTGGGCAGATATTTGT                                                              |
| ToxT Rev RT            | TCCTCGAGACTCTAGTTCTTTTTTCA                                                        |
| NheI- <i>toxT</i>      | TTTGCTAGCTCGATTTTAAGATAAC                                                         |
| <i>toxT</i> -EcoRI     | TTTGAATTCAGACATAATGTTAACTCC                                                       |
| <i>toxT</i> -U5C-fw    | TCGACTTTAAGATAACTTTACGTGG                                                         |
| <i>toxT</i> -U5C-rv    | CCACGTAAGTTATCTTAAAGTCGA                                                          |
| <i>toxT</i> -U7C-fw    | TCGATTCTAAGATAACTTTACGTGG                                                         |
| <i>toxT</i> -U7C-rv    | CCACGTAAGTTATCTTAGAATCGA                                                          |
| <i>toxT</i> -U5,7C-fw  | TCGACTCTAAGATAACTTTACGTGG                                                         |
| <i>toxT</i> -U5,7C-rv  | CCACGTAAGTTATCTTAGAGTCGA                                                          |
| T7- <i>toxT</i>        | GAAATTAATACGACTCACTATAGGGTCGATTTAAGATAACTTTACG                                    |
| <i>toxT</i> -runoff-SP | TGGCCATTGCGTTCTACTCTGAAG                                                          |

**Table S2. Strains and plasmids used**

| Strain/plasmid          | Description                                                  | Reference  |
|-------------------------|--------------------------------------------------------------|------------|
| <b>Strain</b>           |                                                              |            |
| Top10                   | <i>E. coli</i> strain                                        | Invitrogen |
| DH5 $\alpha$            | <i>E. coli</i> strain                                        | (1)        |
| SM10 $\lambda$ pir      | <i>E. coli</i> mating strain                                 | (2)        |
| O395                    | <i>V. cholerae</i> O1 classical biotype                      | (3)        |
| C6706                   | <i>V. cholerae</i> O1 El Tor biotype                         | (4)        |
| KKV598                  | O395 $\Delta$ <i>lacZ</i>                                    | (5)        |
| KKV1678                 | C6706 $\Delta$ <i>lacZ</i>                                   | This study |
| KKV2288                 | KKV598 $\Delta$ <i>toxT</i> ::Cm                             | This study |
| KKV2333                 | O395 <i>toxT</i> 5' UTR U5C                                  | This study |
| KKV2368                 | O395 <i>toxT</i> 5' UTR U7C                                  | This study |
| KKV2372                 | KKV2426 with restored wildtype <i>toxT</i>                   | This study |
| KKV2289                 | KKV2288 with restored wildtype <i>toxT</i>                   | This study |
| KKV2382                 | C6706 <i>toxT</i> 5' UTR U5C, U7C                            | This study |
| KKV2425                 | O395 <i>toxT</i> 5' UTR U5C, U7C                             | This study |
| KKV2426                 | C6706 $\Delta$ <i>toxT</i> ::Cm                              | This study |
| <b>Plasmid</b>          |                                                              |            |
| pBAD18                  | Arabinose-inducible transcriptional fusion vector            | (6)        |
| pBAD24                  | Arabinose-inducible translational fusion vector plasmid      | (6)        |
| pBAD18- <i>lacZ</i> 481 | LacZ translational fusion vector                             | (7)        |
| pBO1296                 | pBAD18- <i>lacZ</i> 481 with native <i>toxT</i> 5' UTR       | This study |
| pBO1299                 | pUC18 with native <i>toxT</i> 5' UTR for structure probing   | This study |
| pBO1826                 | pBAD18- <i>lacZ</i> 481 with <i>toxT</i> 5' UTR U5C          | This study |
| pBO1829                 | pBAD18- <i>lacZ</i> 481 with <i>toxT</i> 5' UTR U7C          | This study |
| pBO1845                 | pUC18 with <i>toxT</i> 5' UTR U5C, U7C for structure probing | This study |
| pKAS46                  | conjugative suicide plasmid                                  | (8)        |
| pKEK87                  | pBAD24 with <i>toxT</i>                                      | (9)        |
| pKEK1445                | pKAS46 with <i>toxT</i> + 1kb flanking regions               | (10)       |
| pKEK1468                | pKEK1445 with <i>toxT</i> 5' UTR U7C                         | This study |
| pKEK1469                | pKEK1445 with <i>toxT</i> 5' UTR U5C                         | This study |
| pKEK1808                | pKEK1445 with <i>toxT</i> 5' UTR U5C, U7C                    | This study |
| pKEK1682                | pBAD18 with native <i>toxT</i> 5' UTR- <i>toxT</i>           | This study |
| pKEK1683                | pBAD18 with <i>toxT</i> 5' UTR U5C- <i>toxT</i>              | This study |
| pKEK1684                | pBAD18 with <i>toxT</i> 5' UTR U7C- <i>toxT</i>              | This study |
| pKEK1685                | pBAD18 with <i>toxT</i> 5' UTR U5C, U7C- <i>toxT</i>         | This study |
| pKEK1733                | pBAD18 with native <i>toxT</i> 5' UTR- <i>toxT</i> -FLAG     | This study |
| pKEK1734                | pBAD18 with <i>toxT</i> 5' UTR U5C- <i>toxT</i> -FLAG        | This study |
| pKEK1735                | pBAD18 with <i>toxT</i> 5' UTR U7C- <i>toxT</i> -FLAG        | This study |
| pKEK1736                | pBAD18 with <i>toxT</i> 5' UTR U5C, U7C- <i>toxT</i> -FLAG   | This study |
| pKEK1789                | pKEK87 with <i>toxT</i> -FLAG                                | This study |
| pKEK1807                | pBAD18- <i>lacZ</i> 481 with <i>toxT</i> 5' UTR U5C, U7C     | This study |
| pKEK1808                | pKEK1445 with <i>toxT</i> 5' UTR U5,7C                       | This study |

- Hanahan D (1983) Studies on transformation of *Escherichia coli* with plasmids. *J Mol Biol* 166(4):557–580.
- Miller VL, Mekalanos JJ (1988) A novel suicide vector and its use in construction of insertion mutations: Osmoregulation of outer membrane proteins and virulence determinants in *Vibrio cholerae* requires *toxR*. *J Bacteriol* 170(6):2575–2583.
- Mekalanos JJ, Collier RJ, Romig WVR (1979) Enzymic activity of cholera toxin. II. Relationships to proteolytic processing, disulfide bond reduction, and subunit composition. *J Biol Chem* 254(13):5855–5861.
- Thelin KH, Taylor RK (1996) Toxin-coregulated pilus, but not mannose-sensitive hemagglutinin, is required for colonization by *Vibrio cholerae* O1 El Tor biotype and O139 strains. *Infect Immun* 64(7):2853–2856.
- Correa NE, Lauriano CM, McGee R, Klose KE (2000) Phosphorylation of the flagellar regulatory protein FlrC is necessary for *Vibrio cholerae* motility and enhanced colonization. *Mol Microbiol* 35(4):743–755.
- Guzman LM, Belin D, Carson MJ, Beckwith J (1995) Tight regulation, modulation, and high-level expression by vectors containing the arabinose P<sub>BAD</sub> promoter. *J Bacteriol* 177(14):4121–4130.
- Waldminghaus T, Fippinger A, Alfsmann J, Narberhaus F (2005) RNA thermometers are common in alpha- and gamma-proteobacteria. *Biol Chem* 386(12):1279–1286.
- Skorupski K, Taylor RK (1996) Positive selection vectors for allelic exchange. *Gene* 169(1):47–52.
- Klose KE, Mekalanos JJ (1998) Distinct roles of an alternative sigma factor during both free-swimming and colonizing phases of the *Vibrio cholerae* pathogenic cycle. *Mol Microbiol* 28(3):501–520.
- Childers BM, et al. (2011) N-terminal residues of the *Vibrio cholerae* virulence regulatory protein ToxT involved in dimerization and modulation by fatty acids. *J Biol Chem* 286(32):28644–28655.
